# Supplementary material for: Sp2- and sp3–C⋯O tetrel bonds in the 3-oxetanone homodimer
Source: Royal Society of Chemistry journal article supplement (doi:10.1039/d2cp00703g), 2022-01-01
Supplement: d2cp00703g1.pdf [file d2cp00703g1.pdf]

## Supporting Information

### ***Sp*<sup>2</sup>- and *sp*<sup>3</sup>-C···O tetrel bonds in the 3-oxetanone homodimer**

Junhua Chen, Hao Wang, Yang Zheng, Xinyue Zhang, Xuefang Xu, Qian Gou

## Supporting Information:

### Content:

**Table S1.** Experimental transition frequencies of the CE1.

**Table S2.** Experimental transition frequencies of  $^{18}\text{O}1$  isotopologue of the CE1.

**Table S3.** Experimental transition frequencies of  $^{18}\text{O}12$  isotopologue of the CE1.

**Table S4.** Experimental transition frequencies of the CC1.

**Table S5.** Experimental transition frequencies of  $^{18}\text{O}1$  isotopologue of the CC1.

**Table S6.** Experimental transition frequencies of  $^{18}\text{O}12$  isotopologue of the CC1.

**Table S7.** Intensities (in arbitrary units) of several selected  $\mu_a$ -type transitions of both observed isomers.

**Table S8.** Stabilization energy (kJ/mol) contributions to the CE1 from NBO analysis results.

**Table S9.** Stabilization energy (kJ/mol) contributions to the CC1 from NBO analysis results.

**Table S10.** Coordinates of isomer CE1 and CC1 calculated at the B2PLYP-D3(BJ)/6-311++g(d,p) level of theory.

**Figure S1.** Geometries of two different perspectives of CE1.

**Figure S2** Shape, principal axes and atom numbering of the CE3.

**Figure S3** Fitted (blue) and derived (red)  $r_0$  structure parameters of isomers CE1 and CC1. Corresponding  $r_e$  parameters (black) are also given for comparison.

**Table S1.** Experimental transition frequencies of the CE1.

| $J'$ | $K_a'$ | $K_c'$ | $\leftarrow$ | $J''$ | $K_a''$ | $K_c''$ | $\nu_{\text{obs}}$ | $\Delta\nu_{\text{obs-calc}}$ |
|------|--------|--------|--------------|-------|---------|---------|--------------------|-------------------------------|
| 5    | 0      | 5      |              | 4     | 0       | 4       | 7538.2407          | -0.0003                       |
| 5    | 1      | 5      |              | 4     | 1       | 4       | 7414.1104          | 0.0008                        |
| 5    | 1      | 4      |              | 4     | 1       | 3       | 7718.1346          | -0.0001                       |
| 5    | 2      | 4      |              | 4     | 2       | 3       | 7570.1187          | 0.0009                        |
| 5    | 2      | 3      |              | 4     | 2       | 2       | 7605.9064          | -0.0016                       |
| 5    | 3      | 3      |              | 4     | 3       | 2       | 7580.1765          | 0.0013                        |
| 5    | 3      | 2      |              | 4     | 3       | 1       | 7580.8818          | -0.0009                       |
| 6    | 0      | 6      |              | 5     | 0       | 5       | 9026.8645          | -0.0001                       |
| 6    | 1      | 6      |              | 5     | 1       | 5       | 8892.2366          | 0.0002                        |
| 6    | 1      | 5      |              | 5     | 1       | 4       | 9256.0453          | 0.0004                        |
| 6    | 2      | 5      |              | 5     | 2       | 4       | 9080.6180          | 0.0026                        |
| 6    | 2      | 4      |              | 5     | 2       | 3       | 9142.3662          | -0.0029                       |
| 6    | 3      | 4      |              | 5     | 3       | 3       | 9097.9939          | 0.0004                        |
| 6    | 3      | 3      |              | 5     | 3       | 2       | 9099.8762          | 0.0003                        |
| 7    | 0      | 7      |              | 6     | 0       | 6       | 10506.4429         | -0.0004                       |
| 7    | 1      | 7      |              | 6     | 1       | 6       | 10368.0870         | 0.0007                        |
| 7    | 1      | 6      |              | 6     | 1       | 5       | 10790.5220         | 0.0002                        |
| 7    | 2      | 6      |              | 6     | 2       | 5       | 10589.2017         | 0.0028                        |
| 7    | 2      | 5      |              | 6     | 2       | 4       | 10685.8156         | -0.0043                       |
| 7    | 3      | 5      |              | 6     | 3       | 4       | 10616.5007         | 0.0008                        |
| 7    | 3      | 4      |              | 6     | 3       | 3       | 10620.7177         | -0.0026                       |
| 7    | 4      | 4      |              | 6     | 4       | 3       | 10612.7616         | 0.0002                        |
| 7    | 4      | 3      |              | 6     | 4       | 2       | 10612.8235         | -0.0003                       |
| 8    | 0      | 8      |              | 7     | 0       | 7       | 11976.9994         | 0.0005                        |
| 8    | 1      | 8      |              | 7     | 1       | 7       | 11841.5000         | 0.0001                        |
| 8    | 1      | 7      |              | 7     | 1       | 6       | 12320.7338         | 0.0004                        |
| 8    | 2      | 7      |              | 7     | 2       | 6       | 12095.5684         | 0.0064                        |
| 8    | 2      | 6      |              | 7     | 2       | 5       | 12235.8709         | -0.0066                       |
| 8    | 3      | 6      |              | 7     | 3       | 5       | 12135.5899         | 0.0008                        |
| 8    | 3      | 5      |              | 7     | 3       | 4       | 12143.9807         | -0.0022                       |
| 9    | 0      | 9      |              | 8     | 0       | 8       | 13439.3679         | -0.0004                       |
| 9    | 1      | 9      |              | 8     | 1       | 8       | 13312.3989         | -0.0002                       |
| 9    | 1      | 8      |              | 8     | 1       | 7       | 13845.7441         | 0.0021                        |
| 9    | 2      | 8      |              | 8     | 2       | 7       | 13599.4195         | 0.0088                        |
| 9    | 2      | 7      |              | 8     | 2       | 6       | 13791.3166         | -0.0109                       |
| 9    | 3      | 7      |              | 8     | 3       | 6       | 13655.0751         | 0.0014                        |
| 9    | 3      | 6      |              | 8     | 3       | 5       | 13670.3326         | -0.0035                       |
| 10   | 0      | 10     |              | 9     | 0       | 9       | 14895.0602         | 0.0006                        |
| 10   | 1      | 10     |              | 9     | 1       | 9       | 14780.7836         | -0.0012                       |
| 10   | 1      | 9      |              | 9     | 1       | 8       | 15364.5167         | 0.0044                        |
| 2    | 2      | 1      |              | 1     | 1       | 0       | 7605.8682          | -0.0018                       |
| 2    | 2      | 0      |              | 1     | 1       | 1       | 7668.6268          | 0.0012                        |
| 3    | 2      | 2      |              | 2     | 1       | 1       | 9059.8126          | 0.0032                        |

|    |   |    |   |   |   |            |         |
|----|---|----|---|---|---|------------|---------|
| 3  | 2 | 1  | 2 | 1 | 2 | 9251.6917  | -0.0019 |
| 3  | 3 | 1  | 2 | 2 | 0 | 12221.3153 | 0.0013  |
| 3  | 3 | 0  | 2 | 2 | 1 | 12223.1587 | -0.0025 |
| 4  | 3 | 2  | 4 | 2 | 3 | 7683.5381  | -0.0028 |
| 4  | 3 | 1  | 4 | 2 | 2 | 7656.6852  | 0.0035  |
| 4  | 1 | 4  | 3 | 0 | 3 | 7294.6364  | 0.0001  |
| 4  | 2 | 3  | 3 | 1 | 2 | 10482.9764 | -0.0004 |
| 4  | 2 | 2  | 3 | 1 | 3 | 10875.6968 | 0.0002  |
| 4  | 3 | 2  | 3 | 2 | 1 | 13732.5023 | -0.0013 |
| 4  | 3 | 1  | 3 | 2 | 2 | 13741.7971 | 0.0006  |
| 4  | 4 | 1  | 3 | 3 | 0 | 16807.5414 | 0.0024  |
| 4  | 4 | 0  | 3 | 3 | 1 | 16807.5708 | -0.0024 |
| 5  | 3 | 3  | 5 | 2 | 4 | 7693.5943  | -0.0040 |
| 5  | 3 | 2  | 5 | 2 | 3 | 7631.6616  | 0.0052  |
| 5  | 1 | 5  | 4 | 0 | 4 | 8667.4454  | 0.0008  |
| 5  | 2 | 4  | 4 | 1 | 3 | 11875.5724 | 0.0000  |
| 5  | 2 | 3  | 4 | 1 | 4 | 12547.6561 | -0.0034 |
| 5  | 3 | 3  | 4 | 2 | 2 | 15236.6219 | 0.0011  |
| 5  | 3 | 2  | 4 | 2 | 3 | 15264.6581 | -0.0016 |
| 6  | 0 | 6  | 5 | 1 | 5 | 7897.6613  | 0.0003  |
| 6  | 1 | 6  | 5 | 0 | 5 | 10021.4395 | -0.0005 |
| 6  | 2 | 5  | 5 | 1 | 4 | 13238.0551 | 0.0019  |
| 6  | 2 | 4  | 5 | 1 | 5 | 14275.9161 | -0.0029 |
| 7  | 0 | 7  | 6 | 1 | 6 | 9511.8673  | -0.0006 |
| 7  | 1 | 7  | 6 | 0 | 6 | 11362.6610 | -0.0008 |
| 7  | 2 | 6  | 6 | 1 | 5 | 14571.2131 | 0.0060  |
| 8  | 0 | 8  | 7 | 1 | 7 | 11120.7802 | -0.0002 |
| 8  | 1 | 8  | 7 | 0 | 7 | 12697.7184 | 0.0001  |
| 9  | 0 | 9  | 8 | 1 | 8 | 12718.6500 | 0.0012  |
| 9  | 1 | 9  | 8 | 0 | 8 | 14033.1162 | -0.0024 |
| 10 | 0 | 10 | 9 | 1 | 9 | 14301.3084 | -0.0009 |
| 10 | 1 | 10 | 9 | 0 | 9 | 15374.5338 | -0.0013 |
| 2  | 2 | 1  | 1 | 1 | 1 | 7666.8129  | 0.0008  |
| 2  | 2 | 0  | 1 | 1 | 0 | 7607.6833  | -0.0002 |
| 3  | 2 | 2  | 2 | 1 | 2 | 9242.6374  | 0.0006  |
| 3  | 2 | 1  | 2 | 1 | 1 | 9068.8611  | -0.0051 |
| 3  | 3 | 1  | 2 | 2 | 1 | 12223.1266 | -0.0009 |
| 3  | 3 | 0  | 2 | 2 | 0 | 12221.3476 | -0.0001 |
| 4  | 3 | 1  | 4 | 2 | 3 | 7683.7756  | -0.0014 |
| 4  | 3 | 2  | 4 | 2 | 2 | 7656.4449  | -0.0007 |
| 4  | 1 | 3  | 3 | 0 | 3 | 7903.8373  | -0.0006 |
| 4  | 2 | 3  | 3 | 1 | 3 | 10848.6028 | 0.0015  |
| 4  | 2 | 2  | 3 | 1 | 2 | 10510.0691 | -0.0030 |
| 4  | 3 | 2  | 3 | 2 | 2 | 13741.5593 | -0.0010 |
| 4  | 3 | 1  | 3 | 2 | 1 | 13732.7496 | 0.0099  |

|   |   |   |   |   |   |            |         |
|---|---|---|---|---|---|------------|---------|
| 4 | 4 | 1 | 3 | 3 | 1 | 16807.5708 | -0.0019 |
| 4 | 4 | 0 | 3 | 3 | 0 | 16807.5404 | 0.0009  |
| 5 | 3 | 2 | 5 | 2 | 4 | 7694.5402  | -0.0017 |
| 5 | 1 | 4 | 4 | 0 | 4 | 9580.6730  | 0.0017  |
| 5 | 2 | 4 | 4 | 1 | 4 | 12484.7783 | 0.0043  |
| 5 | 2 | 3 | 4 | 1 | 3 | 11938.4545 | -0.0034 |
| 5 | 3 | 3 | 4 | 2 | 3 | 15263.7154 | -0.0007 |
| 5 | 3 | 2 | 4 | 2 | 2 | 15237.5644 | 0.0000  |
| 6 | 1 | 5 | 5 | 0 | 5 | 11298.4772 | 0.0020  |
| 6 | 2 | 5 | 5 | 1 | 5 | 14151.2850 | 0.0051  |
| 6 | 2 | 4 | 5 | 1 | 4 | 13362.6864 | -0.0059 |
| 6 | 3 | 4 | 5 | 2 | 4 | 16791.5904 | -0.0014 |
| 6 | 3 | 3 | 5 | 2 | 3 | 16731.5346 | 0.0022  |
| 7 | 1 | 6 | 6 | 0 | 6 | 13062.1340 | 0.0016  |
| 8 | 1 | 7 | 7 | 0 | 7 | 14876.4231 | 0.0006  |

**Table S2.** Experimental transition frequencies of  $^{18}\text{O}1$  isotopologue of the CE1.

| $J'$ | $K_a'$ | $K_c'$ | $\leftarrow$ | $J''$ | $K_a''$ | $K_c''$ | $\nu_{\text{obs}}$ | $\Delta\nu_{\text{obs-calc}}$ |
|------|--------|--------|--------------|-------|---------|---------|--------------------|-------------------------------|
| 4    | 0      | 4      |              | 3     | 0       | 3       | 5948.2391          | 0.0010                        |
| 5    | 0      | 5      |              | 4     | 0       | 4       | 7419.3270          | 0.0011                        |
| 5    | 1      | 5      |              | 4     | 1       | 4       | 7288.9019          | -0.0023                       |
| 5    | 1      | 4      |              | 4     | 1       | 3       | 7616.5663          | -0.0023                       |
| 6    | 0      | 6      |              | 5     | 0       | 5       | 8880.6606          | 0.0009                        |
| 6    | 1      | 6      |              | 5     | 1       | 5       | 8741.1511          | -0.0029                       |
| 6    | 1      | 5      |              | 5     | 1       | 4       | 9132.9742          | -0.0032                       |
| 7    | 0      | 7      |              | 6     | 0       | 6       | 10331.6296         | -0.0005                       |
| 7    | 1      | 7      |              | 6     | 1       | 6       | 10190.7607         | -0.0019                       |
| 7    | 1      | 6      |              | 6     | 1       | 5       | 10645.1930         | -0.0059                       |
| 8    | 0      | 8      |              | 7     | 0       | 7       | 11772.6266         | 0.0042                        |
| 2    | 2      | 1      |              | 1     | 1       | 0       | 7403.3800          | 0.0030                        |
| 2    | 2      | 0      |              | 1     | 1       | 1       | 7471.2808          | 0.0039                        |
| 3    | 3      | 0      |              | 2     | 2       | 1       | 11897.3488         | -0.0034                       |
| 6    | 0      | 6      |              | 5     | 1       | 5       | 7828.8774          | 0.0116                        |
| 2    | 2      | 1      |              | 1     | 1       | 1       | 7469.0984          | 0.0028                        |
| 4    | 1      | 3      |              | 3     | 0       | 3       | 7787.3312          | 0.0016                        |
| 5    | 1      | 4      |              | 4     | 0       | 4       | 9455.6584          | -0.0033                       |

**Table S3.** Experimental transition frequencies of  $^{18}\text{O}12$  isotopologue of the CE1.

| $J'$ | $K_a'$ | $K_c'$ | $\leftarrow$ | $J''$ | $K_a''$ | $K_c''$ | $\nu_{\text{obs}}$ | $\Delta\nu_{\text{obs-calc}}$ |
|------|--------|--------|--------------|-------|---------|---------|--------------------|-------------------------------|
| 4    | 0      | 4      |              | 3     | 0       | 3       | 5855.3346          | 0.0001                        |
| 5    | 0      | 5      |              | 4     | 0       | 4       | 7308.0512          | -0.0028                       |
| 5    | 1      | 5      |              | 4     | 1       | 4       | 7192.7742          | 0.0005                        |
| 5    | 1      | 4      |              | 4     | 1       | 3       | 7469.4806          | 0.0028                        |
| 6    | 0      | 6      |              | 5     | 0       | 5       | 8753.7741          | -0.0019                       |
| 6    | 1      | 6      |              | 5     | 1       | 5       | 8627.3834          | 0.0004                        |
| 6    | 1      | 5      |              | 5     | 1       | 4       | 8958.6692          | 0.0031                        |
| 7    | 0      | 7      |              | 6     | 0       | 6       | 10191.7592         | -0.0017                       |
| 7    | 1      | 7      |              | 6     | 1       | 6       | 10060.0548         | -0.0012                       |
| 7    | 1      | 6      |              | 6     | 1       | 5       | 10445.0541         | 0.0028                        |
| 2    | 2      | 1      |              | 1     | 1       | 0       | 7529.2967          | 0.0007                        |
| 2    | 2      | 0      |              | 1     | 1       | 1       | 7586.2355          | -0.0041                       |
| 3    | 3      | 1      |              | 2     | 2       | 0       | 12104.9919         | 0.0038                        |
| 5    | 1      | 5      |              | 4     | 0       | 4       | 8474.7612          | 0.0044                        |
| 6    | 0      | 6      |              | 5     | 1       | 5       | 7587.0642          | -0.0081                       |
| 6    | 1      | 6      |              | 5     | 0       | 5       | 9794.0934          | 0.0007                        |
| 2    | 2      | 1      |              | 1     | 1       | 1       | 7584.7394          | -0.0034                       |
| 2    | 2      | 0      |              | 1     | 1       | 0       | 7530.7928          | -0.0051                       |

**Table S4.** Experimental transition frequencies of the CC1.

| $J'$ | $K_a'$ | $K_c'$ | $\leftarrow$ | $J''$ | $K_a''$ | $K_c''$ | $\nu_{\text{obs}}$ | $\Delta\nu_{\text{obs-calc}}$ |
|------|--------|--------|--------------|-------|---------|---------|--------------------|-------------------------------|
| 6    | 0      | 6      |              | 5     | 0       | 5       | 7165.5380          | 0.0011                        |
| 6    | 1      | 6      |              | 5     | 1       | 5       | 7019.4717          | -0.0009                       |
| 6    | 1      | 5      |              | 5     | 1       | 4       | 7365.9513          | -0.0005                       |
| 6    | 2      | 5      |              | 5     | 2       | 4       | 7196.2943          | -0.0013                       |
| 6    | 2      | 4      |              | 5     | 2       | 3       | 7231.6234          | 0.0010                        |
| 6    | 3      | 4      |              | 5     | 3       | 3       | 7206.1975          | 0.0019                        |
| 6    | 3      | 3      |              | 5     | 3       | 2       | 7206.8236          | 0.0001                        |
| 6    | 4      | 3      |              | 5     | 4       | 2       | 7204.3917          | 0.0025                        |
| 6    | 4      | 2      |              | 5     | 4       | 1       | 7204.3917          | -0.0012                       |
| 7    | 0      | 7      |              | 6     | 0       | 6       | 8344.8698          | 0.0009                        |
| 7    | 1      | 7      |              | 6     | 1       | 6       | 8185.7867          | 0.0007                        |
| 7    | 1      | 6      |              | 6     | 1       | 5       | 8589.3103          | -0.0018                       |
| 7    | 2      | 6      |              | 6     | 2       | 5       | 8393.0266          | -0.0007                       |
| 7    | 2      | 5      |              | 6     | 2       | 4       | 8449.0812          | 0.0010                        |
| 7    | 3      | 5      |              | 6     | 3       | 4       | 8408.7496          | 0.0004                        |
| 7    | 3      | 4      |              | 6     | 3       | 3       | 8410.1606          | 0.0007                        |
| 7    | 4      | 4      |              | 6     | 4       | 3       | 8406.0686          | -0.0010                       |
| 7    | 4      | 3      |              | 6     | 4       | 2       | 8406.0831          | 0.0012                        |
| 7    | 5      | 3      |              | 6     | 5       | 2       | 8404.6558          | -0.0002                       |
| 7    | 5      | 2      |              | 6     | 5       | 1       | 8404.6558          | -0.0003                       |
| 8    | 0      | 8      |              | 7     | 0       | 7       | 9517.8955          | 0.0004                        |
| 8    | 1      | 8      |              | 7     | 1       | 7       | 9350.5875          | 0.0004                        |
| 8    | 1      | 7      |              | 7     | 1       | 6       | 9810.5267          | -0.0015                       |
| 8    | 2      | 7      |              | 7     | 2       | 6       | 9588.5374          | -0.0026                       |
| 8    | 2      | 6      |              | 7     | 2       | 5       | 9671.5766          | 0.0009                        |
| 8    | 3      | 6      |              | 7     | 3       | 5       | 9611.8557          | -0.0006                       |
| 8    | 3      | 5      |              | 7     | 3       | 4       | 9614.6704          | -0.0016                       |
| 8    | 4      | 5      |              | 7     | 4       | 4       | 9608.1818          | -0.0019                       |
| 8    | 4      | 4      |              | 7     | 4       | 3       | 9608.2159          | -0.0016                       |
| 8    | 5      | 4      |              | 7     | 5       | 3       | 9606.0667          | -0.0007                       |
| 8    | 5      | 3      |              | 7     | 5       | 2       | 9606.0667          | -0.0008                       |
| 9    | 0      | 9      |              | 8     | 0       | 8       | 10684.3162         | 0.0002                        |
| 9    | 1      | 9      |              | 8     | 1       | 8       | 10513.7621         | 0.0012                        |
| 9    | 1      | 8      |              | 8     | 1       | 7       | 11029.1788         | -0.0004                       |
| 9    | 2      | 8      |              | 8     | 2       | 7       | 10782.6613         | -0.0032                       |
| 9    | 2      | 7      |              | 8     | 2       | 6       | 10899.2236         | 0.0020                        |
| 9    | 3      | 7      |              | 8     | 3       | 6       | 10815.4957         | 0.0004                        |
| 9    | 3      | 6      |              | 8     | 3       | 5       | 10820.6429         | 0.0007                        |
| 10   | 0      | 10     |              | 9     | 0       | 9       | 11844.1732         | 0.0020                        |
| 10   | 1      | 10     |              | 9     | 1       | 9       | 11675.2268         | -0.0004                       |
| 10   | 1      | 9      |              | 9     | 1       | 8       | 12244.8004         | -0.0002                       |
| 10   | 2      | 9      |              | 9     | 2       | 8       | 11975.2312         | -0.0043                       |
| 10   | 2      | 8      |              | 9     | 2       | 7       | 12131.7899         | 0.0035                        |

|    |   |    |    |   |    |            |         |
|----|---|----|----|---|----|------------|---------|
| 11 | 0 | 11 | 10 | 0 | 10 | 12997.8612 | 0.0008  |
| 11 | 1 | 11 | 10 | 1 | 10 | 12834.9406 | -0.0006 |
| 11 | 1 | 10 | 10 | 1 | 9  | 13456.8817 | 0.0000  |
| 11 | 2 | 10 | 10 | 2 | 9  | 13166.0890 | -0.0038 |
| 11 | 2 | 9  | 10 | 2 | 8  | 13368.6738 | 0.0022  |
| 12 | 0 | 12 | 11 | 0 | 11 | 14146.1086 | -0.0002 |
| 12 | 1 | 12 | 11 | 1 | 11 | 13992.8915 | -0.0014 |
| 12 | 1 | 11 | 11 | 1 | 10 | 14664.8680 | -0.0004 |
| 12 | 2 | 11 | 11 | 2 | 10 | 14355.0778 | -0.0052 |
| 12 | 2 | 10 | 11 | 2 | 9  | 14608.9485 | 0.0046  |
| 2  | 2 | 1  | 1  | 1 | 0  | 9758.7020  | -0.0025 |
| 2  | 2 | 0  | 1  | 1 | 1  | 9817.5823  | -0.0010 |
| 3  | 3 | 1  | 3  | 2 | 2  | 12312.5627 | -0.0020 |
| 3  | 3 | 0  | 3  | 2 | 1  | 12307.4807 | 0.0000  |
| 3  | 3 | 1  | 2  | 2 | 0  | 15912.0544 | -0.0011 |
| 3  | 3 | 0  | 2  | 2 | 1  | 15913.0847 | -0.0016 |
| 3  | 2 | 2  | 2  | 1 | 1  | 10901.0087 | -0.0022 |
| 3  | 2 | 1  | 2  | 1 | 2  | 11079.6787 | -0.0042 |
| 4  | 2 | 3  | 3  | 1 | 2  | 12014.2294 | 0.0034  |
| 4  | 2 | 2  | 3  | 1 | 3  | 12376.6342 | -0.0003 |
| 4  | 3 | 2  | 4  | 2 | 3  | 12315.3773 | 0.0020  |
| 4  | 3 | 1  | 4  | 2 | 2  | 12300.1838 | 0.0004  |
| 4  | 3 | 2  | 3  | 2 | 1  | 17110.1428 | -0.0006 |
| 4  | 3 | 1  | 3  | 2 | 2  | 17115.3170 | -0.0003 |
| 5  | 3 | 3  | 5  | 2 | 4  | 12321.0443 | 0.0013  |
| 5  | 3 | 2  | 5  | 2 | 3  | 12285.7958 | 0.0005  |
| 5  | 1 | 5  | 4  | 0 | 4  | 8037.5949  | -0.0036 |
| 5  | 2 | 4  | 4  | 1 | 3  | 13098.4505 | -0.0042 |
| 5  | 2 | 3  | 4  | 1 | 4  | 13712.5189 | 0.0083  |
| 6  | 1 | 6  | 5  | 0 | 5  | 9076.5932  | -0.0002 |
| 6  | 2 | 5  | 6  | 1 | 6  | 8001.9749  | -0.0015 |
| 6  | 2 | 5  | 5  | 1 | 4  | 14153.9213 | -0.0007 |
| 6  | 3 | 4  | 6  | 2 | 5  | 12330.9443 | 0.0013  |
| 6  | 3 | 3  | 6  | 2 | 4  | 12260.9957 | -0.0007 |
| 7  | 1 | 7  | 6  | 0 | 6  | 10096.8454 | 0.0030  |
| 7  | 2 | 6  | 7  | 1 | 7  | 8209.2187  | 0.0009  |
| 7  | 2 | 6  | 6  | 1 | 5  | 15181.0003 | 0.0028  |
| 7  | 3 | 5  | 7  | 2 | 6  | 12346.6668 | 0.0019  |
| 7  | 3 | 4  | 7  | 2 | 5  | 12222.0763 | 0.0002  |
| 8  | 1 | 8  | 7  | 0 | 7  | 11102.5603 | -0.0003 |
| 8  | 3 | 6  | 8  | 2 | 7  | 12369.9838 | 0.0026  |
| 8  | 3 | 5  | 8  | 2 | 6  | 12165.1688 | -0.0036 |
| 9  | 0 | 9  | 8  | 1 | 8  | 9099.6521  | 0.0015  |
| 9  | 1 | 9  | 8  | 0 | 8  | 12098.4266 | 0.0002  |
| 10 | 0 | 10 | 9  | 1 | 9  | 10430.0606 | -0.0003 |



|    |   |    |  |    |   |    |            |        |
|----|---|----|--|----|---|----|------------|--------|
| 10 | 1 | 10 |  | 9  | 0 | 9  | 13089.3429 | 0.0054 |
| 11 | 1 | 11 |  | 10 | 0 | 10 | 14080.1080 | 0.0006 |

**Table S5.** Experimental transition frequencies of  $^{18}\text{O}1$  isotopologue of the CC1.

| $J'$ | $K_a'$ | $K_c'$ | $\leftarrow$ | $J''$ | $K_a''$ | $K_c''$ | $\nu_{\text{obs}}$ | $\Delta\nu_{\text{obs-calc}}$ |
|------|--------|--------|--------------|-------|---------|---------|--------------------|-------------------------------|
| 5    | 0      | 5      |              | 4     | 0       | 4       | 5947.4001          | -0.0058                       |
| 5    | 1      | 5      |              | 4     | 1       | 4       | 5813.2016          | -0.0046                       |
| 5    | 1      | 4      |              | 4     | 1       | 3       | 6118.2319          | 0.0003                        |
| 6    | 0      | 6      |              | 5     | 0       | 5       | 7124.1593          | -0.0030                       |
| 6    | 1      | 6      |              | 5     | 1       | 5       | 6972.7624          | -0.0053                       |
| 6    | 1      | 5      |              | 5     | 1       | 4       | 7338.3448          | -0.0043                       |
| 7    | 0      | 7      |              | 6     | 0       | 6       | 8294.3829          | -0.0067                       |
| 7    | 1      | 7      |              | 6     | 1       | 6       | 8130.7681          | -0.0015                       |
| 7    | 1      | 6      |              | 6     | 1       | 5       | 8556.3982          | -0.0009                       |
| 8    | 0      | 8      |              | 7     | 0       | 7       | 9457.4926          | 0.0005                        |
| 8    | 1      | 8      |              | 7     | 1       | 7       | 9287.0592          | 0.0005                        |
| 8    | 1      | 7      |              | 7     | 1       | 6       | 9771.9380          | 0.0004                        |
| 9    | 0      | 9      |              | 8     | 0       | 8       | 10613.2762         | 0.0036                        |
| 9    | 1      | 9      |              | 8     | 1       | 8       | 10441.5172         | 0.0018                        |
| 9    | 1      | 8      |              | 8     | 1       | 7       | 10984.4599         | 0.0061                        |
| 10   | 0      | 10     |              | 9     | 0       | 9       | 11761.9485         | 0.0080                        |
| 2    | 2      | 1      |              | 1     | 1       | 0       | 9463.5526          | -0.0020                       |
| 2    | 2      | 0      |              | 1     | 1       | 1       | 9525.8050          | -0.0017                       |
| 3    | 3      | 1      |              | 2     | 2       | 0       | 15424.7432         | 0.0013                        |
| 3    | 3      | 0      |              | 2     | 2       | 1       | 15425.9383         | 0.0009                        |
| 6    | 1      | 6      |              | 5     | 0       | 5       | 8916.4413          | -0.0006                       |

**Table S6.** Experimental transition frequencies of  $^{18}\text{O}12$  isotopologue of the CC1.

| $J'$ | $K_a'$ | $K_c'$ | $\leftarrow$ | $J''$ | $K_a''$ | $K_c''$ | $\nu_{\text{obs}}$ | $\Delta\nu_{\text{obs-calc}}$ |
|------|--------|--------|--------------|-------|---------|---------|--------------------|-------------------------------|
| 5    | 0      | 5      |              | 4     | 0       | 4       | 5966.2182          | 0.0001                        |
| 5    | 1      | 5      |              | 4     | 1       | 4       | 5834.4924          | 0.0028                        |
| 5    | 1      | 4      |              | 4     | 1       | 3       | 6132.2346          | -0.0048                       |
| 6    | 0      | 6      |              | 5     | 0       | 5       | 7147.5344          | 0.0033                        |
| 6    | 1      | 6      |              | 5     | 1       | 5       | 6998.4987          | 0.0057                        |
| 6    | 1      | 5      |              | 5     | 1       | 4       | 7355.3807          | -0.0003                       |
| 7    | 0      | 7      |              | 6     | 0       | 6       | 8322.6929          | -0.0004                       |
| 7    | 1      | 7      |              | 6     | 1       | 6       | 8161.0395          | 0.0026                        |
| 7    | 1      | 6      |              | 6     | 1       | 5       | 8576.6079          | -0.0008                       |
| 8    | 0      | 8      |              | 7     | 0       | 7       | 9491.1123          | 0.0026                        |
| 8    | 1      | 8      |              | 7     | 1       | 7       | 9321.9603          | 0.0033                        |
| 8    | 1      | 7      |              | 7     | 1       | 6       | 9795.4970          | -0.0052                       |
| 9    | 0      | 9      |              | 8     | 0       | 8       | 10652.5347         | -0.0013                       |
| 2    | 2      | 1      |              | 1     | 1       | 0       | 9601.5690          | 0.0024                        |
| 5    | 1      | 5      |              | 4     | 0       | 4       | 7962.1982          | 0.0010                        |
| 6    | 1      | 6      |              | 5     | 0       | 5       | 8994.4787          | -0.0022                       |
| 7    | 1      | 7      |              | 6     | 0       | 6       | 10007.9837         | -0.0061                       |

**Table S7.** Relative intensities (in arbitrary units) of selected  $\mu_a$ -type transitions of isomers CE1 and CC1.

| Transitions                | Conformer | Frequencies | Intensities |
|----------------------------|-----------|-------------|-------------|
| $6_{06} \leftarrow 5_{05}$ | CE1       | 9026.8645   | 0.0226      |
|                            | CC1       | 7165.5380   | 0.0101      |
| $6_{16} \leftarrow 5_{15}$ | CE1       | 8892.2366   | 0.0161      |
|                            | CC1       | 7019.4717   | 0.0087      |
| $6_{15} \leftarrow 5_{14}$ | CE1       | 9256.0453   | 0.0179      |
|                            | CC1       | 7365.9513   | 0.0112      |
| $7_{07} \leftarrow 6_{06}$ | CE1       | 10506.4429  | 0.0152      |
|                            | CC1       | 8344.8698   | 0.0100      |
| $7_{17} \leftarrow 6_{16}$ | CE1       | 10368.0870  | 0.0131      |
|                            | CC1       | 8185.7867   | 0.0095      |
| $7_{16} \leftarrow 6_{15}$ | CE1       | 10790.5220  | 0.0102      |
|                            | CC1       | 8589.3103   | 0.0081      |
| $7_{26} \leftarrow 6_{25}$ | CE1       | 10589.2017  | 0.0098      |
|                            | CC1       | 8393.0266   | 0.0054      |
| $7_{25} \leftarrow 6_{24}$ | CE1       | 10685.8156  | 0.0103      |
|                            | CC1       | 8449.0812   | 0.0068      |
| $8_{08} \leftarrow 7_{07}$ | CE1       | 11976.9994  | 0.0082      |
|                            | CC1       | 9517.8955   | 0.0096      |
| $8_{18} \leftarrow 7_{17}$ | CE1       | 11841.5000  | 0.0073      |
|                            | CC1       | 9350.5875   | 0.0085      |
| $8_{17} \leftarrow 7_{16}$ | CE1       | 12320.7338  | 0.0086      |
|                            | CC1       | 9810.5267   | 0.0094      |

**Table S8.** Stabilization energy contributions to the CE1 from NBO results.

| Donor NBO                       | Acceptor NBO  | E(2) kJ/mol |
|---------------------------------|---------------|-------------|
| From 3OXT unit 1 to 3OXT unit 2 |               |             |
| BD(1)C12-O10                    | RY*(3)C2      | 0.29        |
| BD(1)C12-O10                    | RY*(5)C2      | 0.29        |
| BD(1)C14-H15                    | BD*(1)C5-H9   | 0.21        |
| BD(1)C14-O10                    | RY*(5)C5      | 0.33        |
| BD(2)C11-O12                    | RY*(1)9       | 0.63        |
| LP(1)O10                        | RY*(1)H7      | 0.25        |
| LP(1)O10                        | BD*(1)C4-H7   | 0.88        |
| LP(1)O10                        | BD*(1)C4-H6   | 0.67        |
| LP(1)O10                        | BD*(2)C2-O1   | 1.63        |
| LP(2)O10                        | RY*(1)C5      | 0.42        |
| LP(2)O10                        | RY*(5)C5      | 0.38        |
| LP(2)O10                        | RY*(2)H9      | 0.33        |
| LP(2)O10                        | RY*(1)C2      | 0.50        |
| LP(2)O10                        | RY*(4)O3      | 0.21        |
| LP(2)O10                        | BD*(1)C10-H6  | 0.54        |
| LP(2)O10                        | BD*(1)C10-O3  | 0.21        |
| LP(2)O10                        | BD*(1)C11-H8  | 0.46        |
| LP(2)O10                        | BD*(1)C2-O1   | 0.21        |
| LP(2)O10                        | BD*(2)C2-O1   | 5.73        |
| From 3OXT unit 2 to 3OXT unit 1 |               |             |
| BD(1)C4-C2                      | RY*(1)O10     | 0.25        |
| BD(1)C4-C2                      | RY*(2)O10     | 0.33        |
| BD(1)C4-O3                      | RY*(1)H15     | 0.25        |
| BD(1)C5-H9                      | BD*(2)C11-O12 | 0.25        |
| BD(1)C5-H8                      | RY*(4)O10     | 0.42        |
| BD(1)C5-O3                      | RY*(1)H15     | 0.33        |
| BD(2)C2-O1                      | BD*(1)C13-H17 | 0.33        |
| LP(2)O1                         | BD*(1)C13-H17 | 0.29        |
| LP(1)O3                         | BD*(1)C14-H15 | 0.71        |
| LP(2)O3                         | RY*(1)H15     | 0.33        |
| LP(2)O3                         | RY*(2)H15     | 0.38        |
| LP(2)O3                         | RY*(5)O10     | 0.25        |
| LP(2)O3                         | BD*(1)C14-H15 | 1.97        |

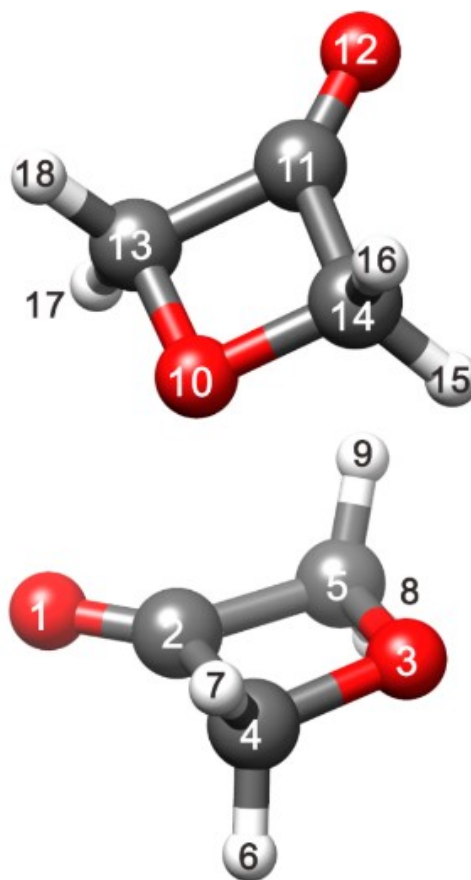

**Table S9.** Stabilization energy contributions to the CC1 from NBO results.

| Donor NBO                       | Acceptor NBO  | E(2) kJ/mol |
|---------------------------------|---------------|-------------|
| From 3OXT unit 1 to 3OXT unit 2 |               |             |
| BD(1)C14-C11                    | RY*(1)C2      | 0.33        |
| BD(1)C14-C11                    | RY*(5)C2      | 0.33        |
| BD(1)C13-H15                    | BD*(2)C2-O1   | 0.25        |
| BD(1)C13-H16                    | BD*(2)C2-O1   | 0.25        |
| BD(1)C11-O10                    | RY*(1)C2      | 0.33        |
| LP(1)O10                        | BD*(2)C2-O1   | 1.63        |
| LP(2)O10                        | BD*(1)C2-O1   | 0.38        |
| LP(2)O10                        | BD*(2)C2-O1   | 5.23        |
| From 3OXT unit 2 to 3OXT unit 1 |               |             |
| BD(1)C2-O1                      | RY*(1)C11     | 0.25        |
| BD(1)C2-O1                      | RY*(5)C11     | 0.46        |
| BD(2)C2-O1                      | RY*(5)C13     | 0.63        |
| BD(2)C2-O1                      | BD*(1)C13-O12 | 1.59        |
| LP(1)O2                         | BD*(1)C13-O12 | 1.09        |
| LP(2)O3                         | RY*(2)O10     | 0.67        |

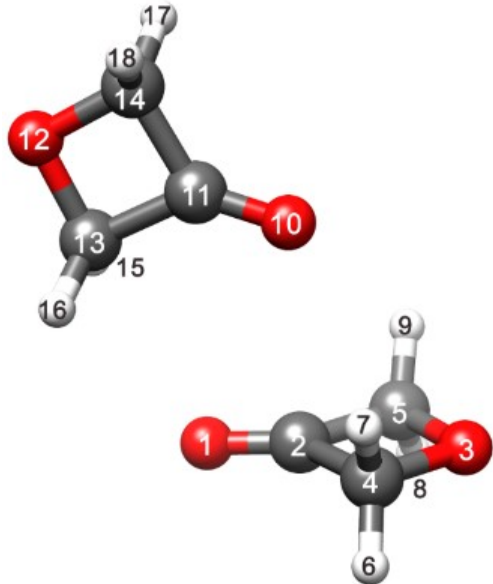

**Table S10.** Coordinates of isomer CE1 and CC1 calculated at the B2PLYP-D3(BJ)/6-311++g(d,p) level of theory.

|     | CE1          |              |              | CC1          |              |              |
|-----|--------------|--------------|--------------|--------------|--------------|--------------|
|     | <i>a</i> [Å] | <i>b</i> [Å] | <i>c</i> [Å] | <i>a</i> [Å] | <i>b</i> [Å] | <i>c</i> [Å] |
| O1  | 1.8734       | 1.7702       | 0.2942       | 0.9314       | 1.6595       | -0.0015      |
| C2  | 1.8536       | 0.5740       | 0.2492       | -1.6767      | 0.7195       | -0.0006      |
| O3  | 1.6921       | -1.5110      | 0.1421       | -3.0491      | -0.8604      | 0.0011       |
| C4  | 2.2376       | -0.5068      | -0.7597      | -2.3788      | -0.1277      | 1.0573       |
| C5  | 1.4148       | -0.5502      | 1.1893       | -2.3798      | -0.1291      | -1.0567      |
| H6  | 3.3150       | -0.6281      | -0.9053      | -3.0765      | 0.4112       | 1.7042       |
| H7  | 1.7091       | -0.4618      | -1.7114      | -1.7084      | -0.7590      | 1.6446       |
| H8  | 2.0634       | -0.6832      | 2.0608       | -3.0780      | 0.4089       | -1.7037      |
| H9  | 0.3678       | -0.5445      | 1.5027       | -1.7099      | -0.7612      | -1.6437      |
| O10 | -0.6661      | 0.2561       | -1.1068      | 0.5186       | -1.1809      | -0.0005      |
| C11 | -2.3038      | -0.0329      | 0.1653       | 1.5469       | -0.5620      | -0.0001      |
| O12 | -3.1975      | -0.2067      | 0.9418       | 3.3506       | 0.4981       | 0.0006       |
| C13 | -1.4892      | 1.1651       | -0.3288      | 1.9578       | 0.9097       | 0.0010       |
| C14 | -1.4538      | -0.9133      | -0.7533      | 3.0322       | -0.9135      | -0.0006      |
| H15 | -0.8489      | -1.6889      | -0.2772      | 1.6786       | 1.4721       | -0.8922      |
| H16 | -1.9980      | -1.3229      | -1.6090      | 1.6788       | 1.4708       | 0.8951       |
| H17 | -0.9140      | 1.7113       | 0.4230       | 3.3853       | -1.4282      | -0.8987      |
| H18 | -2.0492      | 1.8632       | -0.9571      | 3.3856       | -1.4298      | 0.8964       |

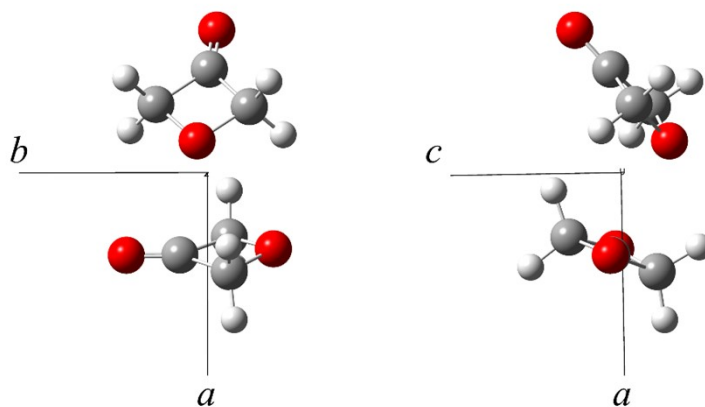

**Figure S1** Geometries of two different perspectives of CE1.

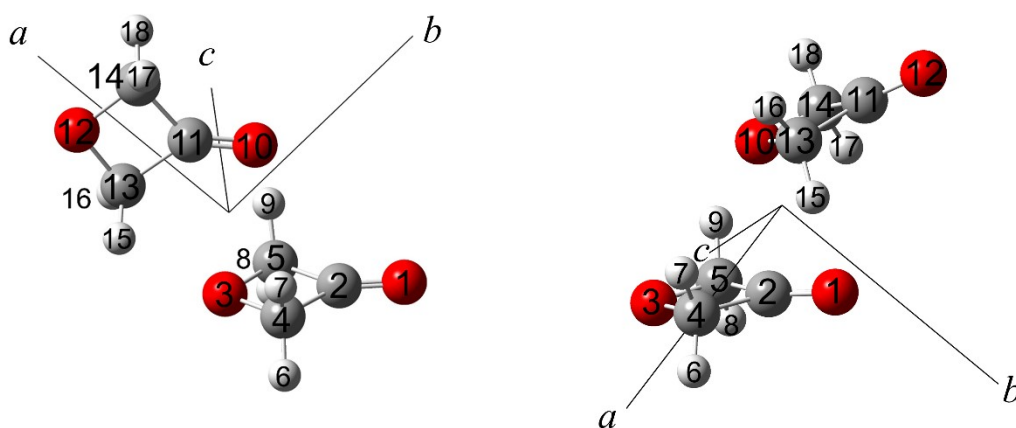

**Figure S2** Shape, principal inertial axes and atom numbering of the CE3 (left) and CE2 (right).

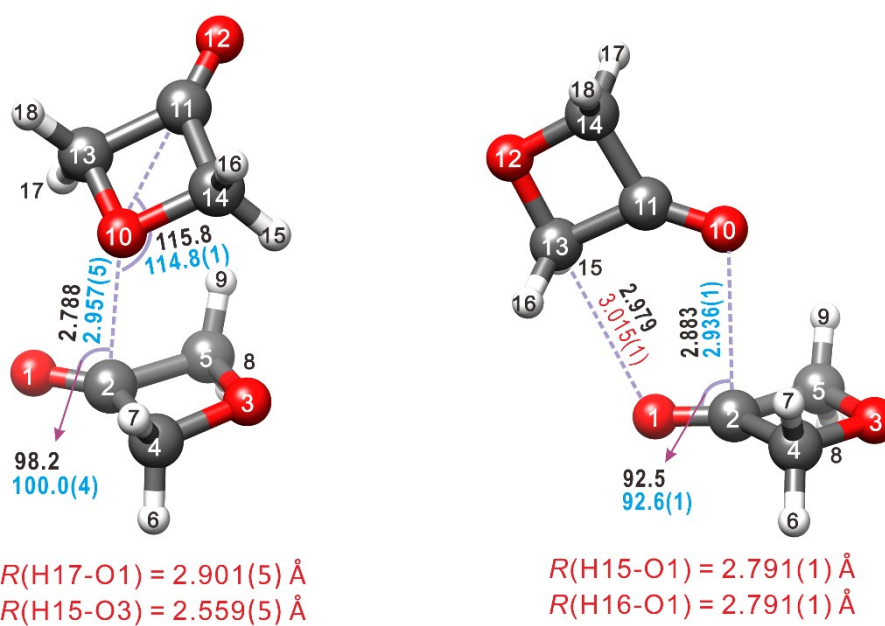

**Figure S3** Fitted (blue) and derived (red)  $r_0$  structure parameters of isomers CE1 (left) and CC1 (right). Corresponding  $r_e$  parameters (black) are also given for comparison.
